# Supplementary material for: Potent neutralization by monoclonal human IgM against SARS‐CoV‐2 is impaired by class switch
Source: PubMed Central journal article supplement (PMC9253785; doi:10.15252/embr.202153956), 2022-05-12
Supplement: EMBR-23-e53956-s005.pdf [file EMBR-23-e53956-s005.pdf]

**Appendix** for 'Potent neutralization by monoclonal human IgM against SARS-CoV-2 is impaired by class switch'.

| Page number | Appendix Table    | Legend                                                                                                                                                                                                                                                                                                                                                          |
|-------------|-------------------|-----------------------------------------------------------------------------------------------------------------------------------------------------------------------------------------------------------------------------------------------------------------------------------------------------------------------------------------------------------------|
| Page 2      | Appendix Table S1 | Demographic features of donors for serum testing and spike-specific B cell sorting.                                                                                                                                                                                                                                                                             |
| Page 3      | Appendix Table S2 | Characteristics of donors from whose B cells monoclonal antibodies were isolated. Sex: "m"= male. Disease course designations are as follows: Mild: loss of smell/taste, mild fever, elevated temperature. Intermediate: fever, cough, chest pain, mild dyspnea, no need for hospitalization.                                                                   |
| Page 4      | Appendix Table S3 | Heavy and light constant region, V-D-J usage, amino acid changes and CDR3 sequences of cloned spike-binding antibodies.                                                                                                                                                                                                                                         |
| Page 5      | Appendix Table S4 | Marker panel used for MACACS phenotyping.                                                                                                                                                                                                                                                                                                                       |
| Page 6      | Appendix Table S5 | SPR antibody binding affinities to recombinant spike protein. All measurements were made with antibodies expressed as IgG1. Full extracellular domain of spike protein was used as antigen when this was stably bound. When binding to full spike ECD was not stable, recombinant subunits based on the ELISA results (Fig 5A) were used instead (last column). |
| Page 7      | Appendix Table S6 | Primer sequences used in amplifying immunoglobulin genes from cDNA.                                                                                                                                                                                                                                                                                             |
| Page 8      | Appendix Table S7 | Primer sequences used in switching class from IgM to IgG1, from IgA to IgM and from IgG to IgM.                                                                                                                                                                                                                                                                 |

**Appendix Table S1**

|                                         | <b>Healthy donor</b> | <b>Convalescent</b> | <b>Post-vaccination</b> |
|-----------------------------------------|----------------------|---------------------|-------------------------|
| Total number                            | 86                   | 34                  | 14                      |
| Mean age                                | 47 years<br>(21-83)  | 43 years<br>(22-75) | 38 years<br>(22-60)     |
| Gender                                  | 43 F (48%)           | 8 F (24%)           | 6 F (43%)               |
| Mean time from<br>infection/vaccination |                      | 39 days (12-71)     | 24 days (13-45)         |

**Appendix Table S2**

| <b>ID</b> | <b>Age</b> | <b>Sex</b> | <b>Date of donation</b> | <b>Onset symptoms</b> | <b>Disease course</b> | <b>B cells obtained for sorting</b> | <b>Spike-capturing B cells sorted and expanded</b> | <b>Spike-specific antibodies produced</b> |
|-----------|------------|------------|-------------------------|-----------------------|-----------------------|-------------------------------------|----------------------------------------------------|-------------------------------------------|
| F2978     | 41         | m          | 30.Mar.2020             | 23.Feb.20             | mild                  | 483'555                             | 954                                                | 198                                       |
| F3005     | 40         | m          | 23.Apr.20               | 16.Mar.20             | intermediate          | 388'978                             | 1094                                               | 41                                        |
| F3007     | 59         | m          | 24.Apr.20               | 13.Mar.20             | mild                  | 127'859                             | 190                                                | 30                                        |
| F3010     | 46         | m          | 30.Apr.20               | 10.Mar.20             | intermediate          | 259'627                             | 273                                                | 26                                        |
| F3015     | 26         | m          | 06.May.20               | 17.Mar.20             | mild                  | 181'083                             | 755                                                | 170                                       |

Appendix Table S3

| Donor ID | Antibody | Heavy chain    |           |         |      |            |                              | Light chain    |         |      |            |             |  |
|----------|----------|----------------|-----------|---------|------|------------|------------------------------|----------------|---------|------|------------|-------------|--|
|          |          | Heavy constant | V         | D       | J    | aa changes | HCDR3                        | Light constant | V       | J    | aa changes | LCDR3       |  |
| F3015    | 1B17     | alpha 1        | 1-69*01   | 5-18*01 | 4*02 | 7          | ATWSDVDTDMFFDY               | kappa          | 3-11*01 | 2*01 | 3          | QQRSNWPPYT  |  |
| F2978    | 1G22     | alpha 1        | 1-69*01   | 3-22*01 | 4*02 | 4          | AITSDYDSSGYYSYDY             | kappa          | 3-11*01 | 2*01 | 0          | HQRSNWPPMYT |  |
| F2978    | 2B15     | alpha 1        | 4-59*01   | N/A     | 4*02 | 0          | ARGFDY                       | kappa          | 3-20*01 | 1*01 | 4          | QQYGSSPPWT  |  |
| F2978    | 2C20     | alpha 1        | 1-2*02    | 3-22*01 | 3*02 | 1          | ARVSYFYDNSGYPGAFDI           | lambda2        | 2-14*01 | 3*02 | 4          | SSYTSSSTWV  |  |
| F2978    | 2J12     | alpha 1        | 3-30-3*01 | 1-26*01 | 4*02 | 3          | ARDRSGSYTYFDY                | kappa          | 3-11*01 | 4*01 | 0          | QQRSNWLT    |  |
| F3015    | 3M13     | alpha 1        | 3-30*18   | 1-26*01 | 3*02 | 5          | AKPRSGNYHDAFDI               | kappa          | 3-20*01 | 2*01 | 1          | QQYGSSYT    |  |
| F2978    | 1G4      | gamma 1        | 5-51*01   | 3-9*01  | 6*02 | 0          | ARLNFDYLSGYYYYYGMDV          | kappa          | 3-20*01 | 4*01 | 0          | QQYGSSRGT   |  |
| F2978    | 1I12     | gamma 1        | 3-30*04   | 3-16*01 | 6*02 | 5          | AKDQVEVEPILMMFGGLTTASVGDV    | kappa          | 3-15*01 | 4*01 | 1          | QQYNNWPPLT  |  |
| F2978    | 1M18     | gamma 1        | 1-2*02    | 3-3*01  | 4*02 | 1          | ARDERSGDFWTAYYYHFDY          | kappa          | 1-12*01 | 5*01 | 0          | QQANSFPLT   |  |
| F2978    | 2O17     | gamma 1        | 3-30*03   | 1-26*01 | 3*02 | 2          | ARPYSGSYWSAFDI               | lambda         | 1-51*01 | 2*01 | 12         | AAWDTSLSGVV |  |
| F3005    | 2N5      | gamma 1        | 3-30*18   | 3-22*01 | 4*02 | 3          | AKEGRGPYYYDSSGYFDY           | kappa          | 1-33*01 | 4*01 | 0          | QQYDNLPT    |  |
| F3005    | 3H9      | gamma 1        | 2-5*01    | 5-12*01 | 6*02 | 4          | VHGYSWYYYGMDV                | lambda         | 2-14*03 | 2*01 | 7          | SSYTASSTLGV |  |
| F3007    | 1K11     | gamma 1        | 4-59*01   | 2-8*01  | 6*02 | 11         | ARVTRYCTKGVCQTDYFDGMDV       | lambda1        | 1-40*01 | 1*01 | 8          | QSYDGSLLGGV |  |
| F3010    | 1B11     | gamma 3        | 3-30*03   | 1-26*01 | 4*02 | 5          | AQADSGGYYSYY                 | kappa          | 6-21*01 | 4*01 | 1          | HQSSSLPHT   |  |
| F3010    | 1I7      | gamma 1        | 1-18*04   | 2-2*02  | 6*02 | 2          | ARDGPFVTVVPTAIRDQVDYYYYYGMDV | kappa          | 2-30*01 | 2*01 | 4          | MQGTHWPPYT  |  |
| F3015    | 1J12     | gamma 1        | 3-30*18   | 2-2*01  | 5*02 | 2          | AKAKDIVVLPALNWFDV            | lambda1        | 2-14*01 | 1*01 | 0          | SSYTSSSTPFV |  |
| F3015    | 2K21     | gamma 1        | 4-4*07    | N/A     | 5*02 | 8          | AMGFDP                       | kappa          | 3-20*01 | 1*01 | 2          | QQYGSSPWT   |  |
| F2978    | 2J17     | mu             | 1-2*02    | 4-11*01 | 4*02 | 3          | ARSNHYTNPVRLDY               | kappa          | 1-33*01 | 4*01 | 1          | QQYDNLPPKLT |  |
| F3005    | 2E14     | mu             | 3-15*01   | 2-15*01 | 4*02 | 2          | IPRPSWYCSGDNCPSYGSAAEHDY     | lambda2        | 3-1*01  | 3*02 | 4          | QAWDSSTEVA  |  |
| F3005    | 3N8      | mu             | 3-23*01   | 4-23*01 | 2*01 | 9          | ARGGGPYWYFDL                 | lambda         | 2-23*01 | 2*01 | 2          | CSYAGSTTHVV |  |

**Appendix Table S4**

| <b>Manufacturer</b> | <b>Catalogue</b> | <b>Marker</b>                     | <b>Clone</b> | <b>Fluorophore</b>           |
|---------------------|------------------|-----------------------------------|--------------|------------------------------|
| BD Pharmingen       | 561295           | CD19                              | H1B19        | PERCPCy5.5                   |
| BD Phosflow         | 563347           | CD20                              | H1           | BV510                        |
| BD Horizon          | 563163           | CD21                              | B-ly4        | BV711                        |
| BD Horizon          | 562513           | CD27                              | M-T271       | BV421                        |
| eBioscience         | 47-0389-42       | CD38                              | HIT2         | APC-eFluor780                |
| Biologend           | 310932           | CD69                              | FN50         | BV785                        |
| Biologend           | 564606           | CD138                             | MI15         | FITC                         |
| Miltenyi            | 130-113-998      | IgA                               | IS11-8E10    | APC                          |
| BD Pharmingen       | 561314           | IgD                               | IA6-2        | PE-Cy7                       |
| BD Pharmingen       | 561296           | IgG                               | G18-145      | Alexa700                     |
| BD Horizon          | 562977           | IgM                               | G20-127      | BV605                        |
| Molecular Probes    | C34557           | donor cell label<br>spike protein |              | cell trace violet<br>mCherry |

**Appendix Table S5**

| <b>Ab</b> | <b>original class</b> | <b>tested class</b> | <b>epitope (ELISA)</b> | <b>Kd (M)</b> | <b>antigen</b> |
|-----------|-----------------------|---------------------|------------------------|---------------|----------------|
| 2E14      | IgM                   | IgG                 | NTD                    | 3.56E-09      | Spike          |
| 2J17      | IgM                   | IgG                 | RBD                    | 2.89E-09      | Spike          |
| 3N8       | IgM                   | IgG                 | RBD                    | 4.98E-09      | Spike          |
| 1I12      | IgG                   | IgG                 | NTD                    | 1.08E-08      | Spike          |
| 1M18      | IgG                   | IgG                 | RBD                    | 2.82E-13      | Spike          |
| 1B11      | IgG                   | IgG                 | S2                     | 7.54E-10      | Spike          |
| 2N5       | IgG                   | IgG                 | RBD                    | 1.37E-10      | RBD            |
| 3h9       | IgG                   | IgG                 | S2                     | 7.63E-11      | S2             |
| 1I7       | IgG                   | IgG                 | S2                     | 3.54E-09      | S2             |
| 1J12      | IgG                   | IgG                 | S2                     | 7.48E-12      | S2             |
| 2K21      | IgG                   | IgG                 | S2                     | 9.92E-11      | S2             |

## Appendix Table S6

### Heavy chain forward

| V gene | forward primer name   | forward primer sequence                           |
|--------|-----------------------|---------------------------------------------------|
| 3-30   | H_3-30_5UTR_for       | TAGAAGTCGGCGGTGTTTCC                              |
| 5-51   | H_5-51_5UTR_for       | CTGGGATCTCAGGGCTTCAT                              |
| 4-59   | H_4-59_5UTR_for       | ACCTCCTGTGCAAGAACATGA                             |
| 1-69   | H_1-69_5UTR_for       | TCTCCTCTAAAGAAGCCCCT                              |
| 3-15   | H_3-15_5UTR_for       | TCCAAGTGTTTTCATTCAGTG                             |
| 1-18   | H1-18_for_Age_or_Bsp  | caaagcaTCCGGAACCGGTctcaccATGGACTGGACCTGGAGC<br>AT |
| 1-2    | H_1-2_5UTR_for        | AATCCCCTGAGAGCTCCGTT                              |
| 4-4    | H_4-4_5UTR_for        | GGACCTCCTGCACAAGAACA                              |
| 2-5    | H_2-5_5UTR_for        | AGTGACTCCTGTGCCCCA                                |
| 3-23   | F3005-3N8_mu_3-23_for | tcaaagcaaccggtgatatcaCTGGGATTTTCAGGTGTTTTCA       |

### Light Chain forward

| V gene | forward primer            | forward primer sequence                                       |
|--------|---------------------------|---------------------------------------------------------------|
| 2-30   | kappaV2-30_for_BspEI      | ttcaaagcaaTCCGGAacctcagttcacctctcacaATG                       |
| 1-33   | K_1-33_5UTR_for           | GTGGTATCAACGCAGAGTACG                                         |
| 1-40   | L_1-40_5UTR_for           | AGAGGCAGCACTCAGGACAA                                          |
| 1-51   | L_1-51_5UTR_for           | TCTTCATCATGACCTGCTCCC                                         |
| 2-14   | L_2-14_5UTR_for           | CAGCGCTCTCAGGACATCTC                                          |
| 3-15   | K_3-15_5UTR_for           | GCTCAGTTAGGACCCAGACG                                          |
| 3-20   | K_3-20_5UTR_for           | GCTGCTCAGTTAGGACCCAG                                          |
| 3-1    | F3005-2E14_lambda_3-1     | CTCAGGAAGCAGCATCGGAG                                          |
| 1-5    | K_1-5_5UTR_for            | GGAGTCAGACCCAGTCAGGA                                          |
| 6-21   | kappaV6-21_for_BspEI      | ttcaaagcaaTCCGGAgccaccATGTTGCCATCACAACCTCATTGG<br>GTTTCTGCTGC |
| 3-11   | K_3-11_5UTR_for           | TAGGACCCAGAGGGAACCAT                                          |
| 1-12   | K_1-12_5UTR_for           | CAGTCAGGACACAGCATGGA                                          |
| 2-23   | F3005-3N8_lambda_2-23_for | CACAAGAGGCAGCGCTCT                                            |
| 2-28   | K_2-28_5UTR_for           | CTCACAATGAGGCTCCCTGCT                                         |

### Heavy chain reverse

| Reverse primer name  | Reverse primer sequence                    |
|----------------------|--------------------------------------------|
| mu_3pUTR_rev_MCS2    | tcatgtctggccagctagctATGCAACATCTCACCCCGTT   |
| gamma_3pUTR_rev_MCS2 | tcatgtctggccagctagctTGGGTGCTTTATTTCCATGCTG |
| alpha_3pUTR_rev_MCS2 | tcatgtctggccagctagctAGCATGGAGTTTATTCAGGGGT |

### Light chain reverse

| reverse primer name    | reverse primer sequence                           |
|------------------------|---------------------------------------------------|
| kappa_3pUTR_rev_MCS1   | tcctaggcgtacgggatccGGGTGAGGTGAAAGATGAGCT          |
| lambda_3pSTOP_rev_MCS1 | tcctaggcgtacgggatccCTATGAACATTCTGTAGGGGCCACTGTCTT |

## Appendix Table 7

### Class switch primers

| Primer name         | Primer sequence                                 |
|---------------------|-------------------------------------------------|
| IGHJ4_Gcon_fus_rev  | gaccgatgggcccttggtggaggcTGAGGAGACGGTGACCAGG     |
| J3_02_rev_fus_to_mu | gaaaagggtggggcggatgcactcccTGAAGAGACGGTGACCATTGT |
| J6_02_rev_fus_to_mu | gaaaagggtggggcggatgcactcccTGAGGAGACGGTGACC      |
| pVITRO_MCS2_for_out | tgagtcaccacacaaagga                             |
| pVITRO_MCS2_for_in  | ctaattcaaagcaaccggtgat                          |
| pVITRO_MCS2_rev_out | aaaacctcccacacctccc                             |
| pVITRO_MCS2_rev_in  | tcactgcattctagttgtggt                           |
| gamma1_constant_for | gcctccACCAAGGGCCCATCGGTC                        |
